# Supplementary material for: Inhibition of the CCL2 receptor, CCR2, enhances tumor response to immune checkpoint therapy
Source: PubMed Central journal article supplement (PMC7699641; doi:10.1038/s42003-020-01441-y), 2020-11-27
Supplement: 42003_2020_1441_MOESM2_ESM.pdf [file 42003_2020_1441_MOESM2_ESM.pdf]

## **Description of Additional Supplementary File**

**File name:** Supplementary Data 1

**Description:** Source data for the main and supplementary figures
